# Supplementary material
Source: Springer Nature journal article supplement (https://www.springermedizin.de/resource/supplementary/12874_2010_442_MOESM1_ESM.pdf/9432108)
Supplement: MOESM1 [file 9432108]

**Data  
appear in  
national  
statistics**

**Positive laboratory test results**

**People who provide faeces  
sample requested by GP**

**People who go to their GP with IID  
and are asked to provide a sample**

**People in the community with IID**
